# Supplementary material for: Tuning the field emission properties of AlN nanocones by doping
Source: Royal Society of Chemistry journal article supplement (doi:10.1039/c4tc02091j), 2014-11-25
Supplement: c4tc02091j1.pdf [file c4tc02091j1.pdf]

## Electronic Supplementary Information

### Tuning the Field Emission Properties of AlN Nanocones by Doping

Qiang Wu,\* Ning Liu, Yongliang Zhang, Weijin Qian, Xizhang Wang and Zheng Hu

Key Laboratory of Mesoscopic Chemistry of MOE, School of Chemistry and Chemical Engineering, Nanjing University, Nanjing 210093, China. E-mail: wqchem@nju.edu.cn

#### Detailed experimental

The CVD growth of doped AlN nanocones was carried out in a three-zone tubular furnace (see Fig. S1). For synthesizing Mg-doped AlN nanocones, anhydrous MgCl<sub>2</sub> was used as a new kind of dopant. Typically, about 0.5 g of anhydrous AlCl<sub>3</sub> and MgCl<sub>2</sub> were separately placed at the precursor-loaded zones I and II and a Si(100) substrate at the deposition zone III. After evacuating and Ar flushing the sealed alumina tube for several times, the three zones were heated to 125, 700 and 750 °C, respectively, under the protection of Ar gas. Flowing Ar of 300 mL min<sup>-1</sup> was then introduced to transport the AlCl<sub>3</sub> and MgCl<sub>2</sub> vapours to zone III, where they mixed and reacted with NH<sub>3</sub> gas (20 mL min<sup>-1</sup>) for 3 h. After the system was cooled down to ambient temperature, AlN nanocone arrays with Mg doping were obtained. If a Mo grid with the diameter of 8 mm was covered on the Si substrate during the growth, patterned arrays of Mg-doped AlN nanocones were gotten by disposing of the Mo grid mask. The preparation procedure for the Si-doped AlN nanocones was quite similar except that the dopant source was SiH<sub>4</sub> in this case. Briefly, anhydrous AlCl<sub>3</sub> and Mo grid-covered Si(100) substrate were loaded at zone I and zone III, respectively. The temperatures of the three zones were also set to be 125, 700 and 750 °C though zone II was nothing-loaded in this synthesis. When the furnace reached the desired temperature, 300 mL min<sup>-1</sup> of Ar, together with 1.5 mL min<sup>-1</sup> of SiH<sub>4</sub>/Ar (SiH<sub>4</sub>, 5 vol%), were introduced into the system. After 3 hours of CVD growth, Si-doped AlN nanocone arrays with patterned distribution were synthesized by in situ doping.

The products were examined by X-ray diffraction (XRD, Philips X'pert Pro X-ray diffractometer), scanning electron microscopy (SEM, Hitachi S-4800) attached with an energy dispersive X-ray spectroscopy (EDS, SHIMADZU-SEDX), and high resolution transmission electron microscopy (HRTEM, JEM-2100). FE properties were tested using a parallel-plate diode configuration with a cathode-anode distance of 100 μm in a vacuum chamber of 8×10<sup>-5</sup> Pa. Before the data recording, the field emission of the sample was carried out for 2 hours under high voltage (~3000 V) for desorbing gaseous species on the nanocone surface and stabilizing the emission.

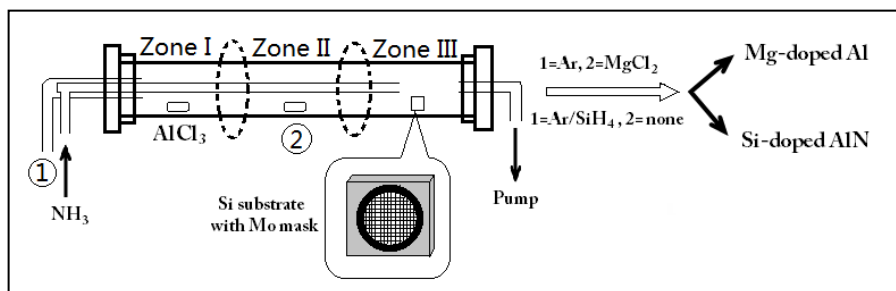

**Fig. S1.** Schematic of three-zone tubular furnace and the synthetic procedure of the AlN nanocone arrays.

**Table S1.** Doping amount of Mg in the AlN nanocones obtained at different vaporization temperature of MgCl<sub>2</sub>.

|                                                    |      |      |      |      |
|----------------------------------------------------|------|------|------|------|
| Vaporization temperature of MgCl <sub>2</sub> (°C) | 700  | 800  | 900  | 1000 |
| Mg content (at.%)                                  | 0.50 | 0.63 | 0.71 | 0.81 |

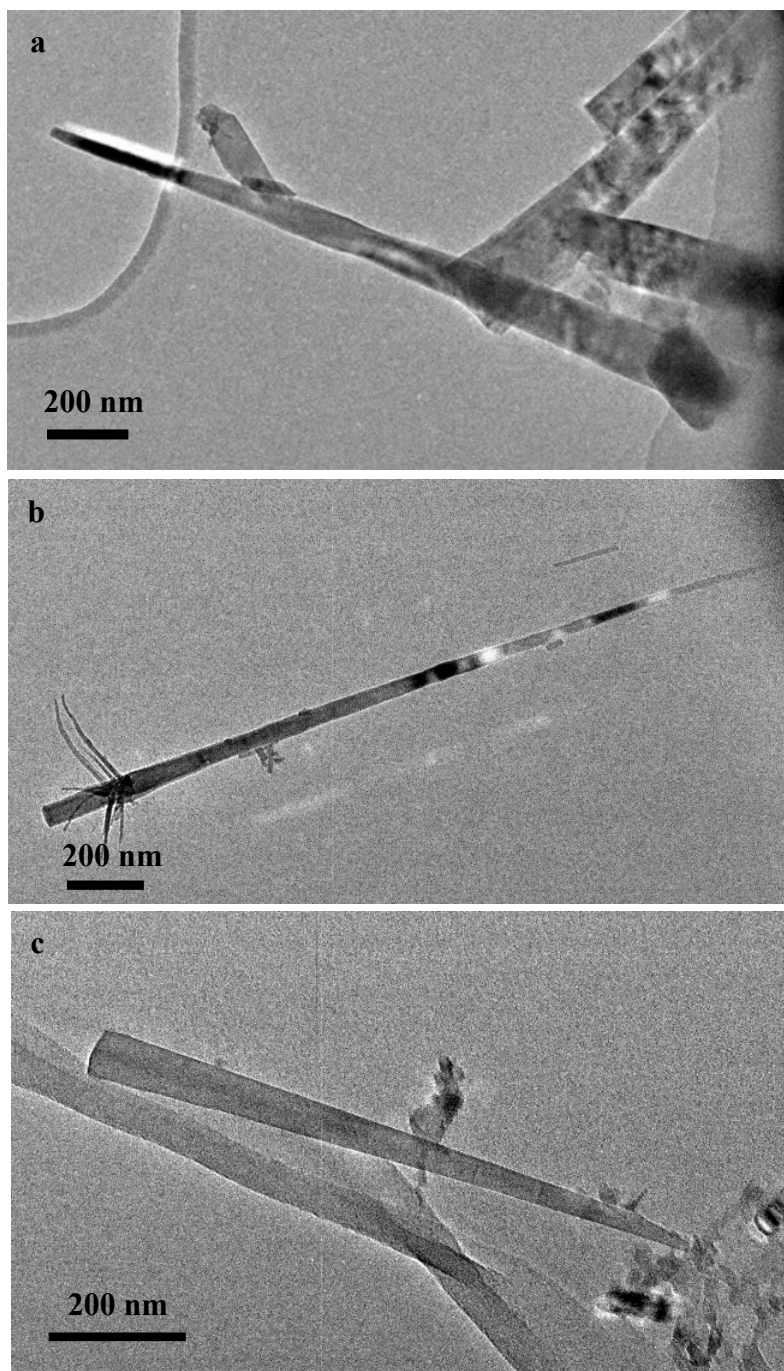

**Fig. S2.** Typical TEM images of the Si-doped (a), Mg-doped (b) and undoped (c) AlN nanocones. It is shown that the AlN samples have conelike morphologies with the length up to 1~2 micrometer and the diameter of 5~20 nm at the tips and ~50 nm at the roots.

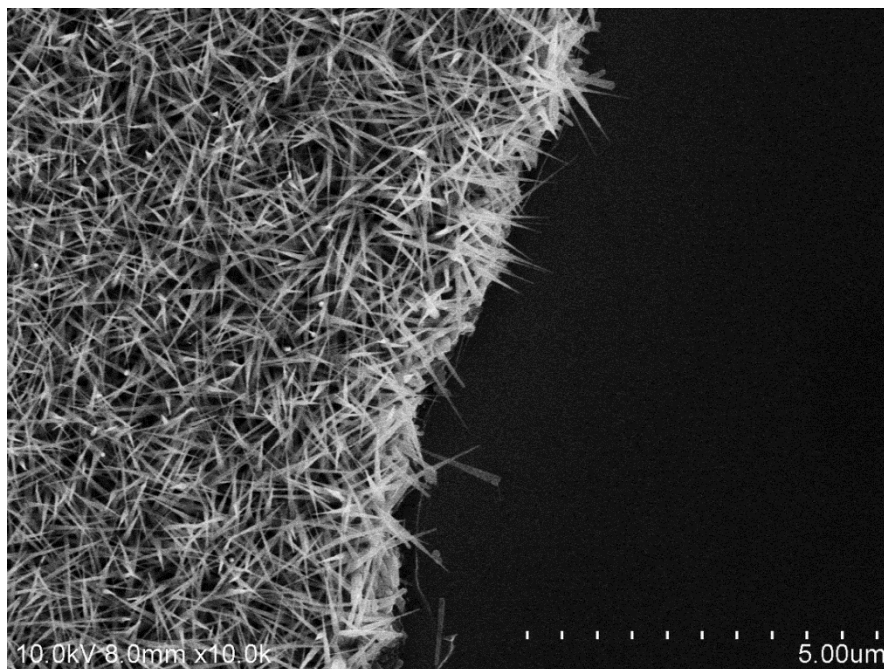

**Fig. S3.** SEM image of Mg-doped AlN nanocones. It is seen that the nanocones are quasi-aligned.

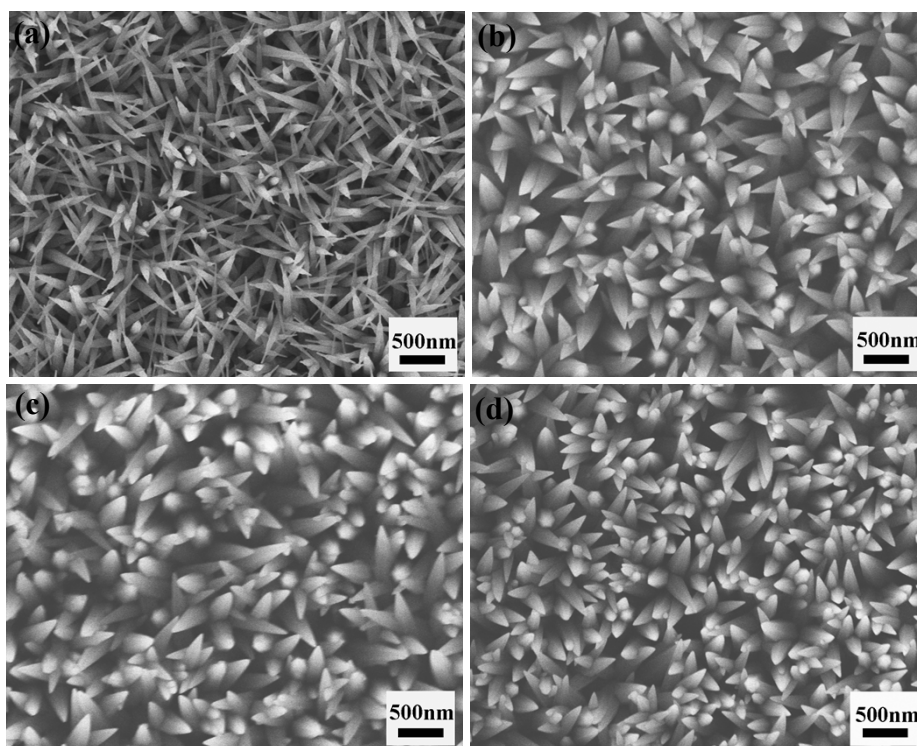

**Fig. S4.** SEM images of the Si-doped AlN nanocones synthesized at different flow rate of  $\text{SiH}_4/\text{Ar}$  gas: (a)  $1 \text{ mL min}^{-1}$ , (b)  $2 \text{ mL min}^{-1}$ , (c)  $5 \text{ mL min}^{-1}$ , (d)  $10 \text{ mL min}^{-1}$ .

From (a) to (d), the Si doping amounts were 2.5, 1.2, 1.0 and 0.7 at.% respectively. Meanwhile, the sharpness and length of the nanocones decreased with increasing the flow rate of SiH<sub>4</sub>/Ar gas. It is learned that high concentration of SiH<sub>4</sub> was unfavorable for the growth of AlN nanocones, probably owing to the formation of Si<sub>3</sub>N<sub>4</sub> species via vapor phase reaction. To obtain Si-doped AlN nanocones with suitable aspect ratio and doping amount, a flow rate of 1.5 mL min<sup>-1</sup> was preferred.

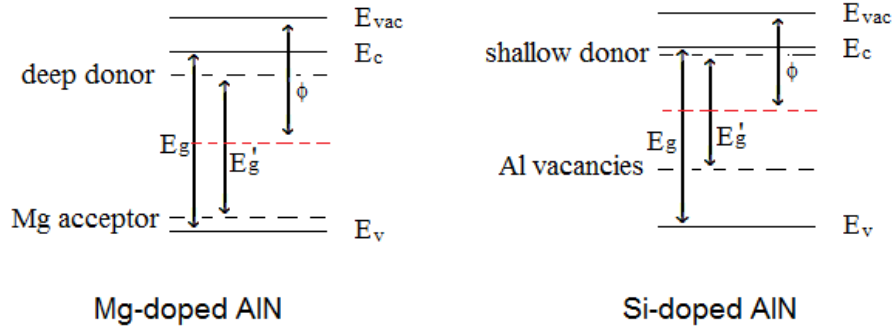

**Fig. S5.** Sketch of energy levels for AlN. Here,  $E_c$ ,  $E_v$  and  $E_{vac}$  are conduction level, valance level and vacuum level, respectively.  $E_g$  is the energy gap between  $E_c$  and  $E_v$ , and  $E_g'$  is the energy gap between the donor and acceptor levels.

The work function can be estimated according to the literature results. Many reports have demonstrated that the Mg-doping could induce the light emission band at 4.70 eV originating from the donor-acceptor pair transition involving  $V_N^{3+}$  donor ( $\sim 0.90$  eV below the conduction band  $E_c$ ) and Mg acceptor ( $\sim 0.51$  eV above the valence band  $E_v$ ) [1,2]. The Si-doping could result in an enhancement of the Al vacancies in the AlN, and thus PL band at 3.50-4.0 eV could be observed, which could be assigned to recombination from a shallow donor ( $60 \pm 20$  meV below the  $E_c$ ) to  $(V_{Al}\text{-complex})^{2-}$  and  $V_{Al}^{3-}$  ( $\sim 2.5$  eV above the  $E_v$ ) [3,4]. The work function of semiconductor could be estimated as the sum of half of the band gap ( $E_g/2$ ) and the electron affinity ( $\chi$ , i.e., the energy gap between  $E_c$  and vacuum energy level  $E_{vac}$ ) [5]. Here, the  $E_g$  should be replaced by  $E_g'$ , i.e., the energy gap between the donor and acceptor levels, because the electron transitions in the doped AlN occurred indeed between these two energy levels. Based on above analysis, the  $\phi$  of the Si-doped AlN is smaller than that of the Mg-doped sample.

## References

- [1] K. B. Mam, et al., Appl. Phys. Lett. 2003, 83, 878-880.
- [2] M. L. Nakarmi, et al., Appl. Phys. Lett. 2006, 89, 152120.
- [3] B. N. Pantha, et al., Appl. Phys. Lett. 2010, 96, 131906.
- [4] E. Monroy, et al., Appl. Phys. Lett. 2006, 88, 071906.
- [5] V. N. Tondare, et al., Appl. Phys. Lett. 2002, 80, 4813-4815.
